# Supplementary material for: Bifidobacterium animalis subsp. lactis A6 attenuates hippocampal damage and memory impairments in an ADHD rat model
Source: Royal Society of Chemistry journal article supplement (doi:10.1039/d3fo04665f), 2024-01-01
Supplement: d3fo04665f1.pdf [file d3fo04665f1.pdf]

## Data availability statement

The 16S rRNA gene sequencing data analyzed in this study are available in the NCBI Sequence Read Archive (SRA) under BioProject accession number PRJNA1057505. Additional inquiries should be addressed to the corresponding author.

**Supplementary table 1. The Immobility time (s), time spent in the central area (s) in open field test (OFT); the investigation time (s) and discrimination index in novel object recognition test (NORT); percentage of time spent in the novel arm and spontaneous alternations in the Y-maze test.**

| Group | Immobility time (s) of OFT | Time spent in the central area (s) of OFT | Investigation time (s) in NORT | Discrimination index in NORT (%) | Percentage of time spent in the novel arm of Y-maze test (%) | Spontaneous alternations in the Y-maze test (%) |
|-------|----------------------------|-------------------------------------------|--------------------------------|----------------------------------|--------------------------------------------------------------|-------------------------------------------------|
| WKY   | 213.21                     | 0.21                                      | 58.33                          | 86.60                            | 41.25                                                        | 50.00                                           |
| WKY   | 113.59                     | 0.50                                      | 55.74                          | 100.00                           | 39.55                                                        | 42.86                                           |
| WKY   | 129.32                     | 1.09                                      | 71.79                          | 100.00                           | 36.93                                                        | 57.14                                           |
| WKY   | 208.59                     | 1.78                                      | 28.33                          | 100.00                           | 32.47                                                        | 58.82                                           |
| WKY   | 172.74                     | 0.59                                      | 54.64                          | 91.30                            | 37.78                                                        | 62.50                                           |
| WKY   | 167.52                     | 2.59                                      | 43.79                          | 70.34                            | 43.98                                                        | 36.84                                           |
| SHR   | 68.84                      | 21.02                                     | 0.00                           | 40.32                            | 34.99                                                        | 26.67                                           |
| SHR   | 69.98                      | 39.98                                     | 26.65                          | 33.55                            | 25.11                                                        | 17.24                                           |
| SHR   | 85.85                      | 35.85                                     | 0.00                           | 34.66                            | 23.63                                                        | 31.58                                           |
| SHR   | 54.10                      | 44.10                                     | 1.65                           | 40.18                            | 25.36                                                        | 35.71                                           |
| SHR   | 70.31                      | 36.31                                     | 36.78                          | 44.37                            | 30.90                                                        | 44.83                                           |
| SHR   | 69.72                      | 53.79                                     | 35.61                          | 43.84                            | 28.64                                                        | 32.38                                           |
| BAA6L | 58.15                      | 38.15                                     | 39.36                          | 47.56                            | 30.90                                                        | 52.63                                           |
| BAA6L | 82.65                      | 53.51                                     | 33.59                          | 37.23                            | 30.31                                                        | 55.00                                           |
| BAA6L | 88.10                      | 28.10                                     | 30.70                          | 50.29                            | 35.03                                                        | 46.15                                           |

|       |        |       |       |       |       |       |
|-------|--------|-------|-------|-------|-------|-------|
| BAA6L | 109.58 | 49.58 | 35.33 | 36.02 | 43.17 | 52.94 |
| BAA6L | 90.94  | 25.94 | 35.80 | 42.69 | 26.93 | 51.81 |
| BAA6L | 77.06  | 22.65 | 33.26 | 34.17 | 28.13 | 52.94 |
| BAA6H | 85.47  | 35.47 | 30.95 | 61.80 | 43.18 | 48.15 |
| BAA6H | 61.76  | 21.76 | 36.76 | 61.62 | 34.57 | 60.00 |
| BAA6H | 58.92  | 28.92 | 32.65 | 53.31 | 49.06 | 60.00 |
| BAA6H | 60.10  | 40.10 | 41.69 | 61.84 | 39.94 | 69.23 |
| BAA6H | 81.56  | 28.93 | 39.57 | 85.59 | 27.25 | 63.64 |
| BAA6H | 68.93  | 39.99 | 38.56 | 60.63 | 38.41 | 55.56 |

**Supplementary table 2. The levels of neurotransmitter dopamine (DA), norepinephrine (NE), acetylcholine (ACh), glutamate (Glu) and its receptor, brain derived neurotrophic factor (BDNF) in brain tissue; the levels of cytokines TNF- $\alpha$ , IL-1 $\beta$ , IL-10 and glutathione in brain tissue.**

| Group | Dopamine (DA) levels (pg/mL) | Norepinephrine (NE) levels (ng/mL) | Acetylcholine (ACh) levels (ng/mL) | Glutamate (Glu) levels ( $\mu$ mol/L) | Glutamate receptor levels (pg/mL) | Brain derived neurotrophic factor (BDNF) levels (ng/L) | TNF- $\alpha$ levels (ng/L) | IL-1 $\beta$ levels (ng/L) | IL-10 levels (ng/L) | Glutathione levels (ng/L) |
|-------|------------------------------|------------------------------------|------------------------------------|---------------------------------------|-----------------------------------|--------------------------------------------------------|-----------------------------|----------------------------|---------------------|---------------------------|
| WKY   | 142.77                       | 25.28                              | 16.45                              | 11.00                                 | 289.93                            | 161.50                                                 | 360.95                      | 25.38                      | 88.52               | 764.70                    |
| WKY   | 198.64                       | 17.37                              | 25.61                              | 8.12                                  | 254.03                            | 296.20                                                 | 271.22                      | 24.20                      | 95.81               | 976.67                    |
| WKY   | 201.18                       | 15.50                              | 22.75                              | 14.43                                 | 289.93                            | 278.89                                                 | 323.01                      | 24.07                      | 98.94               | 969.72                    |
| WKY   | 207.10                       | 21.41                              | 26.73                              | 11.40                                 | 242.83                            | 277.89                                                 | 259.00                      | 31.34                      | 69.96               | 1019.14                   |
| WKY   | 148.70                       | 28.06                              | 20.54                              | 13.83                                 | 299.79                            | 251.74                                                 | 247.87                      | 28.41                      | 92.69               | 1121.62                   |
| WKY   | 159.70                       | 15.41                              | 25.60                              | 10.13                                 | 262.89                            | 268.02                                                 | 298.01                      | 27.44                      | 72.94               | 950.66                    |

|       |        |       |       |       |        |        |        |       |        |        |
|-------|--------|-------|-------|-------|--------|--------|--------|-------|--------|--------|
| SHR   | 112.30 | 12.85 | 15.26 | 15.24 | 295.77 | 134.56 | 366.68 | 32.32 | 15.69  | 655.47 |
| SHR   | 141.92 | 6.39  | 16.32 | 17.77 | 277.41 | 194.45 | 388.97 | 34.73 | 71.23  | 572.46 |
| SHR   | 87.75  | 8.45  | 17.96 | 17.39 | 307.46 | 127.95 | 345.38 | 44.72 | 46.01  | 721.61 |
| SHR   | 56.43  | 7.96  | 16.50 | 13.56 | 290.10 | 134.56 | 438.68 | 48.57 | 24.98  | 644.00 |
| SHR   | 154.62 | 12.70 | 17.49 | 12.96 | 336.99 | 121.61 | 368.40 | 43.06 | 76.17  | 705.56 |
| SHR   | 147.85 | 11.74 | 13.10 | 19.31 | 264.25 | 118.81 | 391.31 | 30.37 | 46.33  | 402.06 |
| BAA6L | 155.47 | 10.59 | 27.52 | 15.37 | 333.34 | 221.05 | 236.05 | 34.95 | 70.32  | 919.85 |
| BAA6L | 146.16 | 19.30 | 19.47 | 17.92 | 345.86 | 167.18 | 341.64 | 34.26 | 89.04  | 847.98 |
| BAA6L | 116.53 | 15.01 | 22.04 | 11.23 | 319.15 | 181.61 | 315.30 | 37.79 | 54.23  | 905.96 |
| BAA6L | 123.30 | 12.10 | 19.06 | 12.47 | 269.30 | 126.59 | 366.01 | 42.30 | 65.75  | 572.07 |
| BAA6L | 152.93 | 16.85 | 23.14 | 10.58 | 317.92 | 149.89 | 194.03 | 31.21 | 50.44  | 709.12 |
| BAA6L | 110.60 | 12.88 | 22.70 | 11.02 | 412.47 | 200.08 | 259.76 | 29.77 | 85.09  | 949.19 |
| BAA6H | 135.15 | 18.84 | 26.46 | 8.00  | 311.63 | 193.66 | 247.57 | 31.14 | 77.18  | 960.97 |
| BAA6H | 195.25 | 11.29 | 24.76 | 10.90 | 205.79 | 254.57 | 229.24 | 24.68 | 51.28  | 938.90 |
| BAA6H | 135.15 | 17.53 | 26.55 | 8.54  | 329.16 | 166.46 | 273.59 | 31.05 | 53.24  | 792.39 |
| BAA6H | 184.25 | 29.58 | 20.65 | 15.32 | 308.00 | 231.60 | 252.56 | 25.14 | 124.16 | 751.90 |
| BAA6H | 198.75 | 14.20 | 21.08 | 13.03 | 415.32 | 199.27 | 249.25 | 32.65 | 110.92 | 982.39 |
| BAA6H | 175.78 | 18.97 | 21.02 | 8.91  | 319.18 | 240.62 | 231.27 | 29.54 | 82.93  | 717.08 |

---
